# Supplementary material for: Accelerated differentiation of human induced pluripotent stem cells into regionally specific dorsal and ventral spinal neural progenitor cells for application in spinal cord therapeutics
Source: Frontiers journal article supplement (doi:10.3389/fnins.2023.1251906), 2023-09-15
Supplement: Image_2.PDF [file Image_2.PDF]

## Supplementary Material

### 1 Supplementary Figures and Tables

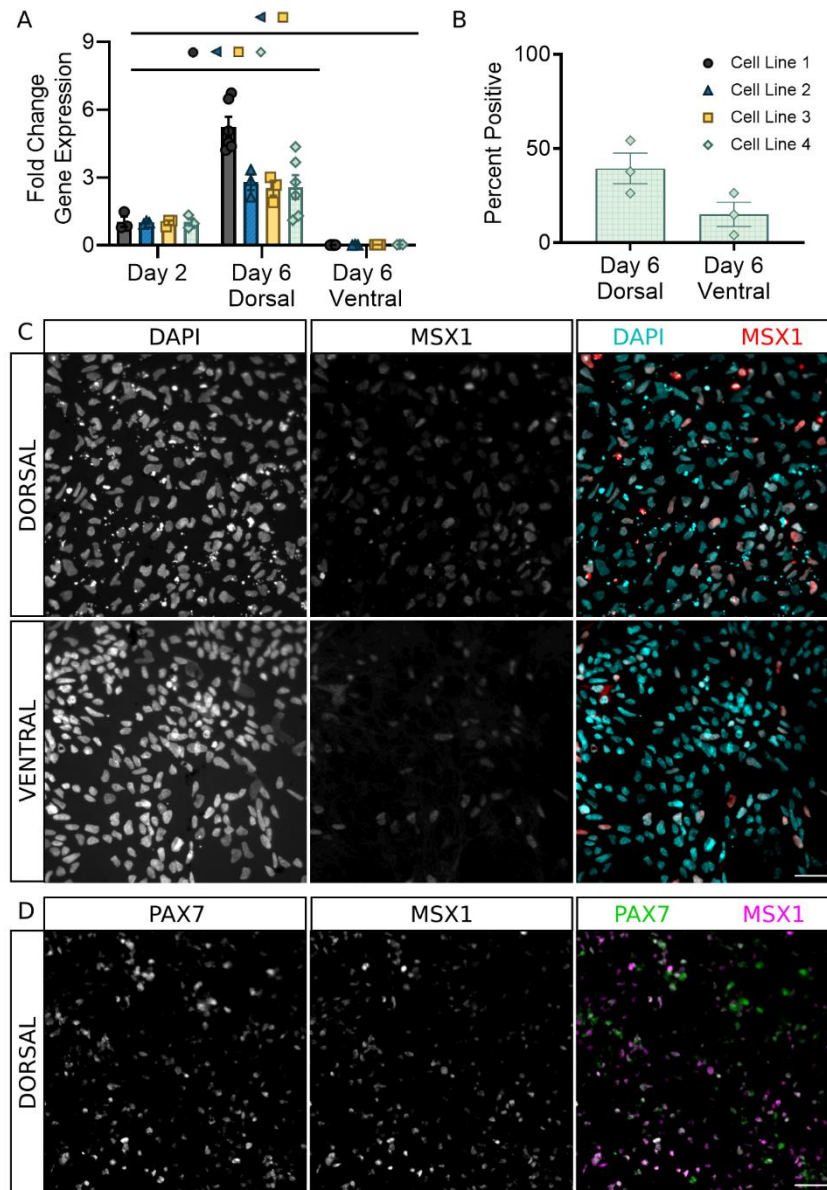

**Supplementary Figure 2. Dorsal progenitor marker MSX1 is expressed in dorsal sNPCs.** (A) Fold change in gene expression as determined by RT-qPCR indicates detectable increases in MSX1 mRNA by day 6 in both dorsal and ventral cells (n=3-5 per line). While dsNPCs show a significant increase in MSX1 expression, vsNPCs show a significant decrease compared to day two ( $p < 0.05$ , One way ANOVA) (B) MSX1 positive cells as a percent of DAPI<sup>+</sup> area (Cell Line 4). (C) Representative images (Cell Line 4) of MSX1 expression at Day 6 in dorsal and ventral populations. (D) Representative images (Cell Line 2) showing co-expression of PAX7 and MSX1 in dsNPCs at Day 6. Scale bar = 50  $\mu$ m. Error Bars = SEM.
